# Supplementary material for: Integrated Analyses of Copy Number Variations and Gene Expression in Lung Adenocarcinoma
Source: PubMed Central journal article supplement (PMC3173487; doi:10.1371/journal.pone.0024829), 2011-09-14
Supplement: pone.0024829.s006.pdf [file pone.0024829.s006.pdf]

| Gene Symbol | CNV Status    | CNV Frequency | p-value  | Log2 Expression Ratio |
|-------------|---------------|---------------|----------|-----------------------|
| ACBD6       | Amplification | 47.62         | 4.63E-08 | 0.66                  |
| ACP6        | Amplification | 50            | 5.67E-08 | 0.94                  |
| ADAR        | Amplification | 45.24         | 5.05E-08 | 0.68                  |
| AGR2        | Amplification | 42.86         | 6.66E-10 | 1.79                  |
| AGT         | Amplification | 33.33         | 1.73E-09 | 2.26                  |
| AMACR       | Amplification | 42.86         | 5.31E-10 | 1.38                  |
| ANLN        | Amplification | 42.86         | 6.06E-10 | 3.12                  |
| ANXA9       | Amplification | 33.33         | 3.31E-06 | 0.83                  |
| APOA1BP     | Amplification | 35.71         | 4.14E-09 | 1.06                  |
| ASPM        | Amplification | 52.38         | 1.85E-06 | 2.11                  |
| AVL9        | Amplification | 30.95         | 5.19E-19 | 1.78                  |
| B4GALT3     | Amplification | 30.95         | 3.71E-07 | 0.75                  |
| BCL9        | Amplification | 47.62         | 2.71E-07 | 0.76                  |
| BOLA1       | Amplification | 42.86         | 2.39E-06 | 0.74                  |
| BZW2        | Amplification | 42.86         | 3.52E-12 | 1.3                   |
| C14orf101   | Amplification | 33.33         | 1.88E-06 | 0.54                  |
| C14orf166   | Amplification | 35.71         | 1.13E-09 | 0.65                  |
| C16orf13    | Amplification | 35.71         | 1.80E-09 | 0.81                  |
| C1GALT1     | Amplification | 38.1          | 7.58E-07 | 1.33                  |
| C1orf106    | Amplification | 33.33         | 1.59E-14 | 2.37                  |
| C1orf107    | Amplification | 47.62         | 4.45E-09 | 0.87                  |
| C1orf112    | Amplification | 50            | 5.35E-09 | 1.47                  |
| C1orf27     | Amplification | 45.24         | 4.83E-07 | 0.95                  |
| C1orf31     | Amplification | 40.48         | 6.88E-09 | 0.84                  |
| C1orf35     | Amplification | 35.71         | 5.67E-09 | 0.54                  |
| C1orf53     | Amplification | 52.38         | 6.47E-08 | 2.13                  |
| C1orf74     | Amplification | 47.62         | 1.88E-09 | 0.63                  |
| C20orf11    | Amplification | 40.48         | 1.31E-09 | 1.12                  |
| C20orf20    | Amplification | 40.48         | 5.01E-08 | 1.15                  |
| C5orf22     | Amplification | 33.33         | 9.91E-09 | 0.69                  |
| C5orf34     | Amplification | 33.33         | 1.74E-07 | 0.67                  |
| C7orf10     | Amplification | 30.95         | 1.07E-07 | 1.28                  |
| C7orf20     | Amplification | 33.33         | 6.02E-10 | 1                     |
| C7orf30     | Amplification | 30.95         | 3.82E-07 | 0.75                  |
| C7orf44     | Amplification | 35.71         | 4.86E-08 | 1.04                  |
| C7orf46     | Amplification | 40.48         | 4.00E-06 | 0.92                  |
| C7orf50     | Amplification | 30.95         | 6.18E-08 | 0.89                  |
| CABLES2     | Amplification | 38.1          | 5.56E-07 | 1.32                  |
| CACYBP      | Amplification | 47.62         | 1.53E-08 | 0.74                  |
| CBX3        | Amplification | 30.95         | 9.36E-12 | 0.9                   |
| CCDC127     | Amplification | 47.62         | 9.57E-07 | 0.58                  |
| CCL28       | Amplification | 30.95         | 1.22E-06 | 1.02                  |
| CCM2        | Amplification | 30.95         | 1.40E-06 | 0.63                  |
| CCT5        | Amplification | 47.62         | 2.41E-08 | 0.75                  |
| CCT6A       | Amplification | 35.71         | 1.96E-11 | 1.33                  |

|         |               |       |          |      |
|---------|---------------|-------|----------|------|
| CD1A    | Amplification | 40.48 | 6.83E-06 | 1.24 |
| CD2AP   | Amplification | 30.95 | 3.26E-06 | 0.93 |
| CDC47L  | Amplification | 40.48 | 3.54E-06 | 1.07 |
| CENPF   | Amplification | 42.86 | 5.41E-09 | 2.25 |
| CENPL   | Amplification | 38.1  | 5.20E-06 | 0.98 |
| CHCHD2  | Amplification | 35.71 | 2.01E-13 | 1    |
| CHD1L   | Amplification | 47.62 | 7.53E-11 | 0.97 |
| CKS1B   | Amplification | 33.33 | 4.20E-09 | 1.28 |
| CLPTM1L | Amplification | 47.62 | 2.11E-09 | 1.13 |
| COG2    | Amplification | 35.71 | 4.83E-11 | 0.75 |
| COPA    | Amplification | 40.48 | 6.06E-08 | 0.58 |
| CRABP2  | Amplification | 40.48 | 2.41E-08 | 2.55 |
| DAP     | Amplification | 47.62 | 8.28E-09 | 1.09 |
| DARS2   | Amplification | 38.1  | 2.27E-07 | 0.7  |
| DCAF13  | Amplification | 30.95 | 2.39E-06 | 0.97 |
| DDX56   | Amplification | 30.95 | 1.64E-07 | 0.96 |
| DNAH14  | Amplification | 33.33 | 3.28E-11 | 1.57 |
| DPY19L1 | Amplification | 47.62 | 1.13E-08 | 1.3  |
| DUSP23  | Amplification | 50    | 3.99E-06 | 0.91 |
| EEF1A2  | Amplification | 38.1  | 4.77E-06 | 1.37 |
| EFNA3   | Amplification | 33.33 | 5.40E-07 | 0.52 |
| EFNA4   | Amplification | 33.33 | 5.00E-14 | 1.95 |
| EFNA5   | Amplification | 30.95 | 5.35E-06 | 1.14 |
| EGFR    | Amplification | 52.38 | 3.10E-06 | 1.42 |
| EGLN3   | Amplification | 33.33 | 3.97E-07 | 1.28 |
| EIF3H   | Amplification | 30.95 | 9.81E-06 | 0.39 |
| ENAH    | Amplification | 30.95 | 1.17E-06 | 0.98 |
| EPRS    | Amplification | 30.95 | 3.23E-11 | 0.8  |
| ETNK2   | Amplification | 38.1  | 4.06E-07 | 0.84 |
| EXO1    | Amplification | 35.71 | 2.48E-08 | 1.3  |
| FAM173A | Amplification | 33.33 | 1.15E-07 | 0.8  |
| FAM173B | Amplification | 47.62 | 3.39E-06 | 0.73 |
| FBXO32  | Amplification | 33.33 | 2.27E-11 | 1.41 |
| FCRL5   | Amplification | 47.62 | 8.36E-07 | 1.64 |
| FH      | Amplification | 47.62 | 3.49E-09 | 0.78 |
| FIGNL1  | Amplification | 50    | 1.10E-08 | 1.87 |
| FLAD1   | Amplification | 33.33 | 2.08E-09 | 0.88 |
| FLVCR1  | Amplification | 33.33 | 9.08E-09 | 1.45 |
| GALNT2  | Amplification | 33.33 | 5.68E-06 | 0.54 |
| GARS    | Amplification | 40.48 | 7.15E-06 | 0.73 |
| GBAS    | Amplification | 35.71 | 1.75E-07 | 1.07 |
| GGCT    | Amplification | 40.48 | 2.40E-12 | 1.56 |
| GLRX2   | Amplification | 47.62 | 2.21E-06 | 0.66 |
| GMDS    | Amplification | 30.95 | 8.24E-12 | 1.54 |
| GOLPH3L | Amplification | 33.33 | 3.20E-08 | 0.94 |
| GOLT1A  | Amplification | 38.1  | 8.98E-06 | 0.93 |

|           |               |       |          |      |
|-----------|---------------|-------|----------|------|
| GORAB     | Amplification | 52.38 | 6.21E-07 | 1.02 |
| GPR89A    | Amplification | 40.48 | 6.38E-14 | 1.12 |
| HDGF      | Amplification | 40.48 | 3.28E-08 | 0.67 |
| HEATR1    | Amplification | 35.71 | 1.97E-07 | 0.56 |
| HEATR2    | Amplification | 33.33 | 3.71E-12 | 0.91 |
| HHAT      | Amplification | 42.86 | 9.11E-07 | 0.78 |
| HIBADH    | Amplification | 47.62 | 1.86E-07 | 0.54 |
| HNRNPA2B1 | Amplification | 30.95 | 4.35E-07 | 0.51 |
| HUS1      | Amplification | 42.86 | 6.12E-08 | 0.8  |
| IARS2     | Amplification | 30.95 | 3.65E-09 | 0.79 |
| ICA1      | Amplification | 42.86 | 2.56E-10 | 0.93 |
| IGF2BP3   | Amplification | 30.95 | 3.23E-08 | 2.41 |
| IGFBP3    | Amplification | 47.62 | 4.34E-06 | 1.52 |
| IGSF9     | Amplification | 50    | 2.03E-11 | 1.56 |
| IKBKE     | Amplification | 42.86 | 1.31E-06 | 0.52 |
| INTS7     | Amplification | 38.1  | 1.60E-06 | 0.89 |
| IQGAP3    | Amplification | 35.71 | 1.17E-07 | 1.55 |
| IRF6      | Amplification | 47.62 | 3.34E-08 | 0.77 |
| ISG20L2   | Amplification | 40.48 | 6.82E-06 | 0.61 |
| JMJD4     | Amplification | 38.1  | 4.44E-08 | 0.61 |
| JMJD8     | Amplification | 33.33 | 3.32E-06 | 0.51 |
| KCNK1     | Amplification | 40.48 | 1.13E-06 | 1.31 |
| KDM5B     | Amplification | 30.95 | 5.53E-09 | 1.07 |
| KIF14     | Amplification | 30.95 | 5.16E-08 | 1.44 |
| KLHL12    | Amplification | 30.95 | 1.06E-07 | 0.79 |
| KLHL7     | Amplification | 40.48 | 1.78E-07 | 1.31 |
| LAD1      | Amplification | 38.1  | 4.48E-08 | 1.44 |
| LANCL2    | Amplification | 45.24 | 3.67E-07 | 0.98 |
| LOC153684 | Amplification | 30.95 | 8.82E-07 | 0.96 |
| LOC25845  | Amplification | 47.62 | 5.44E-07 | 0.91 |
| LOC642852 | Amplification | 30.95 | 4.20E-06 | 1    |
| LOC646762 | Amplification | 42.86 | 7.63E-07 | 0.75 |
| LOC728613 | Amplification | 47.62 | 5.33E-06 | 0.63 |
| LSM5      | Amplification | 30.95 | 4.14E-10 | 1.13 |
| LYSMD1    | Amplification | 30.95 | 3.31E-06 | 0.67 |
| MACC1     | Amplification | 50    | 1.57E-06 | 1.3  |
| MAL2      | Amplification | 38.1  | 1.55E-06 | 0.94 |
| MARCH6    | Amplification | 47.62 | 3.31E-07 | 0.73 |
| METRN     | Amplification | 33.33 | 1.13E-06 | 0.7  |
| METTL13   | Amplification | 47.62 | 3.87E-12 | 0.61 |
| MIOS      | Amplification | 42.86 | 5.98E-07 | 0.67 |
| MPZL1     | Amplification | 45.24 | 6.71E-08 | 0.76 |
| MRPL24    | Amplification | 40.48 | 7.18E-09 | 0.81 |
| MRPL36    | Amplification | 50    | 2.39E-09 | 0.8  |
| MRPL55    | Amplification | 35.71 | 2.47E-09 | 0.74 |
| MRPL9     | Amplification | 47.62 | 8.02E-11 | 1    |

|         |               |       |          |      |
|---------|---------------|-------|----------|------|
| MRPS14  | Amplification | 47.62 | 4.44E-08 | 0.66 |
| MRPS24  | Amplification | 35.71 | 4.71E-14 | 0.99 |
| MUT     | Amplification | 35.71 | 2.76E-06 | 0.68 |
| NARFL   | Amplification | 30.95 | 8.96E-07 | 0.59 |
| NEK2    | Amplification | 35.71 | 5.24E-10 | 2.38 |
| NFE2L3  | Amplification | 30.95 | 6.20E-08 | 1.61 |
| NIT1    | Amplification | 30.95 | 1.50E-06 | 0.48 |
| NSL1    | Amplification | 33.33 | 1.16E-06 | 0.72 |
| NSMCE2  | Amplification | 30.95 | 3.26E-07 | 0.64 |
| NUPL2   | Amplification | 38.1  | 4.43E-12 | 1.15 |
| OSBPL2  | Amplification | 30.95 | 5.87E-06 | 0.81 |
| OSMR    | Amplification | 42.86 | 4.70E-06 | 1.21 |
| PAIP1   | Amplification | 35.71 | 2.34E-09 | 1.21 |
| PDCD6   | Amplification | 47.62 | 1.92E-06 | 0.74 |
| PEX11B  | Amplification | 38.1  | 2.54E-07 | 0.79 |
| PFDN2   | Amplification | 30.95 | 2.34E-06 | 0.55 |
| PHF14   | Amplification | 42.86 | 2.27E-08 | 1.06 |
| PIAS3   | Amplification | 40.48 | 6.94E-10 | 1.03 |
| PIGM    | Amplification | 50    | 1.15E-06 | 0.7  |
| PLEKHA6 | Amplification | 38.1  | 3.27E-08 | 1.35 |
| PLEKHA8 | Amplification | 42.86 | 2.34E-11 | 1.84 |
| POLD2   | Amplification | 40.48 | 7.34E-08 | 0.89 |
| POLM    | Amplification | 38.1  | 1.49E-06 | 0.67 |
| PRLR    | Amplification | 42.86 | 3.45E-06 | 1.7  |
| PRUNE   | Amplification | 30.95 | 1.77E-07 | 0.65 |
| PSMA2   | Amplification | 45.24 | 5.74E-06 | 0.67 |
| PSMB4   | Amplification | 30.95 | 2.28E-08 | 0.66 |
| PSMD4   | Amplification | 30.95 | 9.72E-07 | 0.51 |
| PSMG3   | Amplification | 30.95 | 1.35E-12 | 1.39 |
| PSPH    | Amplification | 35.71 | 8.56E-12 | 2.22 |
| PVRL4   | Amplification | 30.95 | 5.57E-08 | 0.94 |
| PYGO2   | Amplification | 33.33 | 1.93E-07 | 0.7  |
| RAB40C  | Amplification | 35.71 | 2.44E-07 | 1.14 |
| RABIF   | Amplification | 30.95 | 6.50E-11 | 0.68 |
| RAD1    | Amplification | 40.48 | 3.98E-08 | 0.99 |
| RAE1    | Amplification | 30.95 | 1.97E-13 | 0.97 |
| RALGPS2 | Amplification | 42.86 | 2.70E-06 | 1.13 |
| RBM8A   | Amplification | 38.1  | 1.34E-08 | 0.61 |
| RHBDL1  | Amplification | 35.71 | 5.05E-07 | 0.76 |
| RNASEN  | Amplification | 33.33 | 3.09E-07 | 0.74 |
| RNF187  | Amplification | 33.33 | 9.60E-06 | 0.68 |
| RPA3    | Amplification | 40.48 | 9.34E-07 | 1.01 |
| RPS10P7 | Amplification | 33.33 | 3.94E-06 | 0.56 |
| RPUSD1  | Amplification | 30.95 | 2.92E-06 | 0.4  |
| S100A11 | Amplification | 57.14 | 1.12E-06 | 0.51 |
| SAMD12  | Amplification | 35.71 | 2.33E-06 | 1.08 |

|          |               |       |          |      |
|----------|---------------|-------|----------|------|
| SCRN1    | Amplification | 42.86 | 9.48E-08 | 1.05 |
| SCYL3    | Amplification | 50    | 7.44E-07 | 0.7  |
| SDHA     | Amplification | 47.62 | 1.66E-07 | 0.51 |
| SDHC     | Amplification | 33.33 | 3.85E-11 | 0.66 |
| SEC61G   | Amplification | 54.76 | 2.55E-06 | 0.97 |
| SETDB1   | Amplification | 35.71 | 6.85E-07 | 0.67 |
| SFT2D2   | Amplification | 42.86 | 2.26E-06 | 0.66 |
| SHC1     | Amplification | 33.33 | 2.86E-06 | 0.67 |
| SIX1     | Amplification | 33.33 | 1.11E-08 | 3.06 |
| SIX4     | Amplification | 33.33 | 2.50E-07 | 1.75 |
| SLC37A1  | Amplification | 30.95 | 1.47E-07 | 0.56 |
| SMG7     | Amplification | 45.24 | 5.22E-08 | 0.72 |
| SMYD3    | Amplification | 33.33 | 6.95E-10 | 0.89 |
| SNAP47   | Amplification | 38.1  | 2.69E-11 | 0.82 |
| SNRPE    | Amplification | 30.95 | 4.21E-10 | 0.85 |
| SPINK1   | Amplification | 30.95 | 3.17E-09 | 4.92 |
| SRD5A1   | Amplification | 45.24 | 1.30E-12 | 2.28 |
| STK31    | Amplification | 38.1  | 1.39E-08 | 1.4  |
| STX16    | Amplification | 35.71 | 7.75E-06 | 0.87 |
| STX6     | Amplification | 45.24 | 4.05E-06 | 0.7  |
| SUB1     | Amplification | 35.71 | 5.65E-08 | 0.46 |
| SUSD4    | Amplification | 35.71 | 9.14E-09 | 1.34 |
| TAF2     | Amplification | 30.95 | 1.54E-06 | 0.6  |
| TAF4     | Amplification | 30.95 | 1.63E-08 | 0.91 |
| TAF5L    | Amplification | 30.95 | 4.48E-07 | 0.33 |
| TARBP1   | Amplification | 40.48 | 1.37E-06 | 0.81 |
| TARS     | Amplification | 38.1  | 2.03E-06 | 0.8  |
| TAX1BP1  | Amplification | 47.62 | 6.34E-07 | 0.59 |
| TBRG4    | Amplification | 40.48 | 1.50E-10 | 0.9  |
| TDRKH    | Amplification | 50    | 5.33E-10 | 1.6  |
| TFB2M    | Amplification | 30.95 | 9.00E-06 | 0.77 |
| TH1L     | Amplification | 33.33 | 5.52E-11 | 1.25 |
| TMCO1    | Amplification | 38.1  | 9.33E-07 | 0.77 |
| TMED4    | Amplification | 30.95 | 6.49E-07 | 0.62 |
| TMEM106B | Amplification | 50    | 4.95E-10 | 1.89 |
| TMEM184A | Amplification | 30.95 | 1.73E-07 | 0.8  |
| TMEM9    | Amplification | 40.48 | 9.56E-09 | 0.94 |
| TOR3A    | Amplification | 33.33 | 3.28E-08 | 0.72 |
| TRAPPC9  | Amplification | 30.95 | 2.59E-06 | 0.63 |
| TRIM11   | Amplification | 35.71 | 7.46E-07 | 0.54 |
| TRMT5    | Amplification | 33.33 | 1.27E-08 | 0.94 |
| TTC13    | Amplification | 30.95 | 2.32E-07 | 0.9  |
| UBE2D4   | Amplification | 35.71 | 3.29E-07 | 0.56 |
| UBE2Q1   | Amplification | 35.71 | 1.88E-08 | 0.46 |
| UBE2T    | Amplification | 40.48 | 1.13E-12 | 1.99 |
| UFC1     | Amplification | 30.95 | 9.82E-07 | 0.51 |

|          |               |       |          |       |
|----------|---------------|-------|----------|-------|
| VAPB     | Amplification | 33.33 | 9.43E-08 | 0.89  |
| VPS45    | Amplification | 38.1  | 1.05E-10 | 0.9   |
| VPS72    | Amplification | 30.95 | 2.42E-10 | 0.8   |
| WDR24    | Amplification | 33.33 | 3.90E-07 | 0.72  |
| XPR1     | Amplification | 47.62 | 7.10E-11 | 1.63  |
| YKT6     | Amplification | 40.48 | 7.16E-10 | 0.81  |
| YTHDF1   | Amplification | 40.48 | 5.17E-08 | 1.12  |
| ZC3H11A  | Amplification | 30.95 | 2.75E-06 | 0.53  |
| ZNF238   | Amplification | 42.86 | 5.55E-06 | 0.96  |
| ZNF275   | Amplification | 30.95 | 8.08E-06 | 0.66  |
| ZNF281   | Amplification | 30.95 | 4.06E-08 | 0.94  |
| ZNF572   | Amplification | 33.33 | 1.46E-06 | 0.52  |
| ZNF672   | Amplification | 38.1  | 1.94E-06 | 0.54  |
| ZNF692   | Amplification | 38.1  | 3.05E-06 | 0.86  |
| ABHD6    | Deletion      | 30.95 | 2.70E-10 | -1.01 |
| ACACB    | Deletion      | 30.95 | 1.71E-06 | -1.43 |
| ADIPOR2  | Deletion      | 30.95 | 3.62E-08 | -0.92 |
| AIF1L    | Deletion      | 45.24 | 2.42E-08 | -1.44 |
| AKAP12   | Deletion      | 35.71 | 9.48E-10 | -2.39 |
| AKNA     | Deletion      | 30.95 | 1.72E-07 | -0.92 |
| AMD1     | Deletion      | 42.86 | 3.66E-06 | -0.71 |
| ANKDD1A  | Deletion      | 30.95 | 2.47E-07 | -0.94 |
| ANKRD11  | Deletion      | 30.95 | 2.20E-06 | -0.48 |
| ANKRD29  | Deletion      | 30.95 | 1.02E-15 | -3.4  |
| ANP32B   | Deletion      | 30.95 | 1.56E-06 | -0.57 |
| ARHGAP19 | Deletion      | 30.95 | 1.58E-06 | -0.46 |
| ARHGEF10 | Deletion      | 30.95 | 1.01E-13 | -1.44 |
| ARHGEF15 | Deletion      | 50    | 9.16E-11 | -1.34 |
| ARHGEF3  | Deletion      | 30.95 | 1.62E-08 | -0.99 |
| ARL3     | Deletion      | 38.1  | 8.44E-07 | -0.44 |
| ASAH1    | Deletion      | 33.33 | 9.01E-06 | -0.61 |
| ASPA     | Deletion      | 38.1  | 4.73E-11 | -1.89 |
| AVPI1    | Deletion      | 30.95 | 3.35E-07 | -0.86 |
| BCL6B    | Deletion      | 45.24 | 2.63E-09 | -1.14 |
| C10orf67 | Deletion      | 30.95 | 7.94E-09 | -1.02 |
| C13orf1  | Deletion      | 38.1  | 1.39E-11 | -1.58 |
| C17orf91 | Deletion      | 52.38 | 4.18E-08 | -1.66 |
| C18orf8  | Deletion      | 33.33 | 6.81E-06 | -0.63 |
| C19orf59 | Deletion      | 38.1  | 2.19E-09 | -2.92 |
| C3orf42  | Deletion      | 30.95 | 1.92E-06 | -0.46 |
| C3orf63  | Deletion      | 35.71 | 3.97E-06 | -0.86 |
| C5AR1    | Deletion      | 45.24 | 3.09E-06 | -1.68 |
| C8orf4   | Deletion      | 33.33 | 1.52E-06 | -1.31 |
| CALHM2   | Deletion      | 30.95 | 2.48E-07 | -0.85 |
| CAMP     | Deletion      | 47.62 | 3.21E-06 | -0.85 |
| CARD8    | Deletion      | 38.1  | 6.23E-08 | -1.32 |

|            |          |       |          |       |
|------------|----------|-------|----------|-------|
| CCBE1      | Deletion | 38.1  | 1.08E-15 | -2.1  |
| CCDC25     | Deletion | 40.48 | 6.90E-07 | -0.7  |
| CCDC68     | Deletion | 35.71 | 5.43E-09 | -1.69 |
| CDK9       | Deletion | 42.86 | 2.32E-06 | -0.33 |
| CDKN2B     | Deletion | 38.1  | 4.96E-13 | -2.52 |
| CFD        | Deletion | 30.95 | 2.99E-11 | -2.67 |
| CHMP1B     | Deletion | 33.33 | 5.38E-08 | -1.11 |
| CLIC3      | Deletion | 30.95 | 2.52E-11 | -2.19 |
| CLU        | Deletion | 42.86 | 4.38E-09 | -2.17 |
| CNN1       | Deletion | 40.48 | 4.74E-06 | -1.08 |
| COX7A1     | Deletion | 30.95 | 1.67E-09 | -1.46 |
| CSGALNACT1 | Deletion | 30.95 | 3.42E-06 | -1.59 |
| CYB5R3     | Deletion | 30.95 | 9.99E-06 | -0.55 |
| DAB2IP     | Deletion | 30.95 | 8.69E-10 | -0.97 |
| DCC        | Deletion | 30.95 | 1.75E-06 | -1.09 |
| DDX19B     | Deletion | 35.71 | 4.43E-06 | -0.72 |
| DENND2A    | Deletion | 30.95 | 6.93E-11 | -1.56 |
| DENND4C    | Deletion | 33.33 | 4.28E-07 | -0.71 |
| DHDPSL     | Deletion | 33.33 | 3.22E-06 | -0.63 |
| DLC1       | Deletion | 30.95 | 3.58E-11 | -2.44 |
| DNAH12     | Deletion | 30.95 | 2.51E-06 | -1.7  |
| DNAJB12    | Deletion | 35.71 | 3.00E-06 | -0.37 |
| DNASE1L3   | Deletion | 30.95 | 2.09E-09 | -2.08 |
| DOCK6      | Deletion | 38.1  | 3.14E-06 | -0.79 |
| DPYSL2     | Deletion | 42.86 | 2.72E-08 | -1.36 |
| EEF1A1     | Deletion | 35.71 | 8.26E-07 | -1.06 |
| EFHA2      | Deletion | 33.33 | 3.24E-09 | -1.87 |
| EHD2       | Deletion | 45.24 | 6.20E-06 | -0.85 |
| ELAVL1     | Deletion | 38.1  | 2.17E-06 | -0.54 |
| EMR1       | Deletion | 40.48 | 1.52E-06 | -1.23 |
| ENG        | Deletion | 42.86 | 9.38E-08 | -1.04 |
| EPB49      | Deletion | 38.1  | 1.72E-06 | -0.54 |
| ERICH1     | Deletion | 38.1  | 2.56E-07 | -0.9  |
| EVI5       | Deletion | 30.95 | 5.08E-09 | -0.86 |
| FAM101B    | Deletion | 45.24 | 4.49E-07 | -1.14 |
| FAM116A    | Deletion | 40.48 | 3.38E-09 | -0.79 |
| FAM129B    | Deletion | 42.86 | 2.80E-06 | -0.58 |
| FAM167A    | Deletion | 30.95 | 5.40E-07 | -1.38 |
| FAM189A2   | Deletion | 30.95 | 1.33E-12 | -2.1  |
| FAM82A2    | Deletion | 40.48 | 1.83E-06 | -0.5  |
| FBP1       | Deletion | 40.48 | 7.04E-06 | -0.96 |
| FGD3       | Deletion | 33.33 | 1.51E-08 | -1.19 |
| FNTA       | Deletion | 38.1  | 2.38E-06 | -0.51 |
| FOSB       | Deletion | 45.24 | 1.19E-07 | -2.91 |
| FOXO1      | Deletion | 30.95 | 1.74E-08 | -1.3  |
| FRMD4B     | Deletion | 30.95 | 2.17E-06 | -0.98 |

|           |          |       |          |       |
|-----------|----------|-------|----------|-------|
| FUT1      | Deletion | 45.24 | 8.08E-08 | -1.06 |
| FXR2      | Deletion | 50    | 1.70E-06 | -0.41 |
| GABARAPL1 | Deletion | 33.33 | 1.34E-08 | -1.17 |
| GADD45B   | Deletion | 40.48 | 3.50E-07 | -1.45 |
| GAS7      | Deletion | 40.48 | 1.51E-06 | -0.98 |
| GATA6     | Deletion | 40.48 | 2.50E-08 | -2.39 |
| GFRA2     | Deletion | 40.48 | 2.33E-08 | -0.71 |
| GLIPR2    | Deletion | 30.95 | 5.16E-12 | -1.43 |
| GNA11     | Deletion | 40.48 | 7.99E-06 | -0.42 |
| GOLGA7    | Deletion | 38.1  | 6.14E-10 | -0.76 |
| GPRC5A    | Deletion | 35.71 | 2.02E-08 | -1.72 |
| HIF3A     | Deletion | 47.62 | 9.15E-08 | -1.31 |
| HMGB1     | Deletion | 33.33 | 1.28E-13 | -1.2  |
| IER2      | Deletion | 38.1  | 1.70E-06 | -0.98 |
| IFT88     | Deletion | 30.95 | 1.30E-08 | -0.73 |
| IL17D     | Deletion | 30.95 | 6.65E-09 | -1.22 |
| INO80C    | Deletion | 30.95 | 4.05E-07 | -1.05 |
| INPP5K    | Deletion | 52.38 | 1.42E-09 | -0.74 |
| JUND      | Deletion | 30.95 | 2.65E-09 | -0.81 |
| KANK2     | Deletion | 38.1  | 3.19E-08 | -1.22 |
| KANK3     | Deletion | 38.1  | 8.57E-15 | -2.14 |
| KATNA1    | Deletion | 33.33 | 1.67E-07 | -0.67 |
| KIAA0427  | Deletion | 38.1  | 8.62E-12 | -0.88 |
| KIF13B    | Deletion | 40.48 | 4.99E-07 | -0.69 |
| KLF2      | Deletion | 30.95 | 3.15E-09 | -1.81 |
| KLF4      | Deletion | 54.76 | 2.29E-07 | -2.45 |
| KLHL9     | Deletion | 33.33 | 9.56E-07 | -0.83 |
| KLK10     | Deletion | 35.71 | 2.44E-08 | -1.7  |
| KPNA3     | Deletion | 38.1  | 1.29E-06 | -0.89 |
| LAMC3     | Deletion | 42.86 | 3.36E-07 | -0.84 |
| LATS2     | Deletion | 47.62 | 5.80E-09 | -1.42 |
| LDLR      | Deletion | 38.1  | 4.47E-06 | -1.66 |
| LGI3      | Deletion | 38.1  | 1.52E-10 | -1.42 |
| LIMD1     | Deletion | 30.95 | 3.04E-07 | -0.92 |
| LPL       | Deletion | 35.71 | 1.29E-07 | -1.9  |
| LRRFIP2   | Deletion | 33.33 | 7.26E-07 | -0.5  |
| LTBP4     | Deletion | 30.95 | 6.77E-11 | -1.81 |
| MAP3K8    | Deletion | 30.95 | 2.31E-07 | -1.92 |
| MAP4      | Deletion | 47.62 | 1.55E-06 | -0.65 |
| MAPK1     | Deletion | 30.95 | 1.26E-07 | -0.57 |
| MAPKAP1   | Deletion | 30.95 | 9.16E-06 | -0.52 |
| MAPRE2    | Deletion | 30.95 | 2.87E-08 | -0.89 |
| MPHOSPH8  | Deletion | 35.71 | 1.67E-07 | -0.79 |
| MPRIP     | Deletion | 33.33 | 4.87E-06 | -0.59 |
| MTUS1     | Deletion | 35.71 | 1.40E-06 | -0.83 |
| MYADM     | Deletion | 38.1  | 7.41E-11 | -1.65 |

|             |          |       |          |       |
|-------------|----------|-------|----------|-------|
| MYH10       | Deletion | 35.71 | 1.26E-10 | -1.58 |
| MYO1C       | Deletion | 54.76 | 1.33E-06 | -0.86 |
| MYO5B       | Deletion | 30.95 | 1.18E-07 | -1.25 |
| MYST4       | Deletion | 30.95 | 8.65E-07 | -0.86 |
| NDEL1       | Deletion | 35.71 | 1.06E-08 | -0.85 |
| NEDD4L      | Deletion | 35.71 | 1.47E-10 | -2.52 |
| NEK3        | Deletion | 35.71 | 4.54E-07 | -0.89 |
| NFATC1      | Deletion | 35.71 | 2.94E-06 | -0.99 |
| NPDC1       | Deletion | 30.95 | 3.54E-07 | -0.97 |
| NUP214      | Deletion | 45.24 | 5.42E-06 | -0.4  |
| OGG1        | Deletion | 38.1  | 8.07E-06 | -0.59 |
| OLFM1       | Deletion | 30.95 | 2.95E-06 | -1.24 |
| OLFML2A     | Deletion | 38.1  | 1.00E-08 | -1.41 |
| OSBPL1A     | Deletion | 30.95 | 2.42E-06 | -0.98 |
| OTUD1       | Deletion | 33.33 | 6.53E-11 | -1.44 |
| PAFAH1B1    | Deletion | 54.76 | 1.10E-06 | -0.74 |
| PALM2-AKAP2 | Deletion | 30.95 | 2.08E-10 | -2.48 |
| PCM1        | Deletion | 33.33 | 4.89E-10 | -1.77 |
| PCMT1       | Deletion | 33.33 | 8.26E-06 | -0.65 |
| PDLIM2      | Deletion | 42.86 | 1.63E-11 | -1.32 |
| PEBP4       | Deletion | 42.86 | 5.42E-12 | -3.15 |
| PIK3R5      | Deletion | 38.1  | 6.55E-06 | -0.84 |
| PIP5K1B     | Deletion | 30.95 | 1.37E-06 | -2.19 |
| PLAC2       | Deletion | 40.48 | 4.24E-10 | -1.42 |
| PLAC9       | Deletion | 35.71 | 2.03E-11 | -2.43 |
| PLEKHA2     | Deletion | 35.71 | 1.54E-07 | -0.82 |
| PMP22       | Deletion | 30.95 | 9.92E-11 | -1.41 |
| POLDIP3     | Deletion | 30.95 | 5.80E-08 | -0.59 |
| PPP1R14A    | Deletion | 30.95 | 7.18E-13 | -2.31 |
| PPP1R15A    | Deletion | 42.86 | 1.83E-11 | -1.89 |
| PPP2CB      | Deletion | 50    | 5.01E-07 | -1.06 |
| PPP3CC      | Deletion | 40.48 | 1.55E-07 | -0.88 |
| PPP6C       | Deletion | 52.38 | 2.65E-08 | -0.94 |
| PQLC1       | Deletion | 38.1  | 6.08E-08 | -0.71 |
| PROSC       | Deletion | 38.1  | 5.87E-07 | -0.92 |
| PRX         | Deletion | 30.95 | 3.56E-07 | -0.99 |
| PSIP1       | Deletion | 47.62 | 2.50E-08 | -1.16 |
| PTGDS       | Deletion | 30.95 | 3.06E-11 | -2.36 |
| R3HCC1      | Deletion | 42.86 | 8.01E-06 | -0.55 |
| RAB11FIP1   | Deletion | 45.24 | 1.65E-10 | -1.78 |
| RAPGEF1     | Deletion | 30.95 | 3.72E-09 | -0.99 |
| RASIP1      | Deletion | 45.24 | 1.74E-14 | -2.12 |
| RBPMS       | Deletion | 42.86 | 8.63E-06 | -0.79 |
| RFX2        | Deletion | 33.33 | 2.60E-06 | -1.3  |
| RICH2       | Deletion | 35.71 | 5.95E-12 | -1.2  |
| RILPL2      | Deletion | 35.71 | 4.99E-06 | -0.69 |

|            |          |       |          |       |
|------------|----------|-------|----------|-------|
| RNF125     | Deletion | 54.76 | 9.15E-08 | -1.32 |
| RNF38      | Deletion | 45.24 | 9.75E-10 | -0.73 |
| RRAGA      | Deletion | 30.95 | 4.28E-06 | -0.64 |
| RRAS       | Deletion | 38.1  | 3.35E-10 | -1.33 |
| SAP18      | Deletion | 45.24 | 2.31E-10 | -1.06 |
| SASH1      | Deletion | 30.95 | 5.76E-09 | -1.89 |
| SAT2       | Deletion | 50    | 2.53E-07 | -0.67 |
| SCAI       | Deletion | 45.24 | 2.14E-08 | -1.77 |
| SCARA3     | Deletion | 40.48 | 5.94E-08 | -1.46 |
| SCARA5     | Deletion | 45.24 | 2.19E-09 | -2.8  |
| SEC63      | Deletion | 30.95 | 6.55E-06 | -1.15 |
| SEMA3G     | Deletion | 30.95 | 4.17E-06 | -1.81 |
| SETX       | Deletion | 35.71 | 3.26E-06 | -0.44 |
| SFTPC      | Deletion | 38.1  | 3.21E-10 | -3.92 |
| SFTPD      | Deletion | 33.33 | 3.13E-08 | -3.22 |
| SH2D3C     | Deletion | 42.86 | 1.45E-12 | -1.83 |
| SH3BP5     | Deletion | 30.95 | 1.52E-10 | -1.16 |
| SH3GL2     | Deletion | 30.95 | 5.96E-07 | -1.29 |
| SLC19A3    | Deletion | 30.95 | 5.01E-07 | -1.27 |
| SLC25A25   | Deletion | 45.24 | 5.16E-08 | -1.06 |
| SLC44A2    | Deletion | 38.1  | 9.15E-07 | -0.8  |
| SLC6A16    | Deletion | 40.48 | 3.16E-07 | -1.05 |
| SLMAP      | Deletion | 40.48 | 2.50E-08 | -0.99 |
| SMAD7      | Deletion | 45.24 | 3.17E-06 | -1.08 |
| SOX7       | Deletion | 30.95 | 4.60E-10 | -3.26 |
| SPNS2      | Deletion | 35.71 | 5.61E-07 | -0.86 |
| SPOCK2     | Deletion | 30.95 | 3.47E-19 | -3.01 |
| SRGN       | Deletion | 30.95 | 7.94E-06 | -0.72 |
| ST6GALNAC6 | Deletion | 42.86 | 1.08E-09 | -0.92 |
| TACC1      | Deletion | 33.33 | 1.32E-13 | -1.44 |
| TACC2      | Deletion | 33.33 | 3.43E-07 | -1.2  |
| TBXA2R     | Deletion | 42.86 | 5.61E-06 | -0.73 |
| TCF4       | Deletion | 30.95 | 3.33E-11 | -1.53 |
| TEK        | Deletion | 30.95 | 2.72E-10 | -2.67 |
| TEKT1      | Deletion | 42.86 | 8.37E-06 | -1.23 |
| TFRC       | Deletion | 30.95 | 1.02E-06 | -1.38 |
| TGFBR3     | Deletion | 30.95 | 2.03E-15 | -2.78 |
| TJP2       | Deletion | 33.33 | 5.49E-11 | -1.42 |
| TMEM146    | Deletion | 40.48 | 1.46E-06 | -1.84 |
| TMEM88     | Deletion | 40.48 | 2.06E-10 | -1.17 |
| TNFRSF1A   | Deletion | 35.71 | 2.02E-06 | -0.58 |
| TNFSF12    | Deletion | 50    | 6.41E-06 | -0.59 |
| TNNC1      | Deletion | 30.95 | 2.38E-15 | -3.6  |
| TOM1L2     | Deletion | 40.48 | 1.55E-10 | -1.03 |
| TRAK1      | Deletion | 30.95 | 2.04E-06 | -0.59 |
| TRIM35     | Deletion | 40.48 | 8.63E-06 | -0.51 |

|        |          |       |          |       |
|--------|----------|-------|----------|-------|
| TRPV2  | Deletion | 42.86 | 1.09E-07 | -1.05 |
| ULK2   | Deletion | 35.71 | 7.49E-06 | -0.88 |
| USHBP1 | Deletion | 30.95 | 9.60E-06 | -0.42 |
| USP8   | Deletion | 33.33 | 2.30E-07 | -0.72 |
| VPS4B  | Deletion | 35.71 | 6.65E-06 | -0.6  |
| VWF    | Deletion | 33.33 | 4.38E-13 | -2.27 |
| WAPAL  | Deletion | 45.24 | 4.29E-07 | -0.57 |
| WDR47  | Deletion | 33.33 | 2.52E-06 | -0.65 |
| XPO4   | Deletion | 30.95 | 1.14E-07 | -0.61 |
| ZBTB34 | Deletion | 40.48 | 1.75E-08 | -0.86 |
| ZBTB4  | Deletion | 45.24 | 1.68E-08 | -0.91 |
| ZFP36  | Deletion | 30.95 | 2.34E-07 | -1.52 |
| ZNF331 | Deletion | 30.95 | 3.23E-08 | -1.87 |
| ZNF596 | Deletion | 35.71 | 4.80E-06 | -0.55 |
| ZRANB1 | Deletion | 35.71 | 8.50E-08 | -0.6  |
| ZZEF1  | Deletion | 40.48 | 5.21E-06 | -0.77 |
