# Supplementary material for: Integrated Analyses of Copy Number Variations and Gene Expression in Lung Adenocarcinoma
Source: PubMed Central journal article supplement (PMC3173487; doi:10.1371/journal.pone.0024829), 2011-09-14
Supplement: pone.0024829.s007.pdf [file pone.0024829.s007.pdf]

**Table S2. Empirical  $p$ -values of the canonical pathways in GSE4573<sup>a</sup>**

| <b>Canonical Pathway</b>              | <b>GSE4573</b> |
|---------------------------------------|----------------|
| <b>IL-3 Signaling</b>                 | 0.1522         |
| <b>Aminoacyl-tRNA Biosynthesis</b>    | 0.3499         |
| <b>EIF2 Signaling</b>                 | 0.2816         |
| <b>PTEN Signaling</b>                 | 0.0311         |
| <b>Renal Cell Carcinoma Signaling</b> | 0.1679         |
| <b>Oncostatin M Signaling</b>         | 0.0188         |
| <b>Ephrin Receptor Signaling</b>      | 0.0124         |

<sup>a</sup>The significance levels were determined by comparison with null baselines created by random selections.
