# Supplementary material for: Integrated Analyses of Copy Number Variations and Gene Expression in Lung Adenocarcinoma
Source: PubMed Central journal article supplement (PMC3173487; doi:10.1371/journal.pone.0024829), 2011-09-14
Supplement: pone.0024829.s008.pdf [file pone.0024829.s008.pdf]

**Table S3. Sample characteristics of lung cancer patients examined by both Affymetrix SNP6.0 and Affymetrix U133plus 2.0 arrays.**

| <b>Characteristics</b> | <b>Microarray</b> |
|------------------------|-------------------|
| <b>Sample Number</b>   | 42                |
| <b>Age</b>             | 62.0±10           |
| <b>Histology</b>       |                   |
| <b>Adenocarcinoma</b>  | 42 (100%)         |
| <b>Gender</b>          |                   |
| <b>Female</b>          | 42 (100%)         |
| <b>Stage</b>           |                   |
| <b>IA</b>              | 7 (17%)           |
| <b>IB</b>              | 14 (33%)          |
| <b>IIA</b>             | 3 (7%)            |
| <b>IIB</b>             | 6 (14%)           |
| <b>IIIA</b>            | 7 (17%)           |
| <b>IIIB</b>            | 4 (10%)           |
| <b>IV</b>              | 1 (2%)            |
