# Supplementary material for: Integrated Analyses of Copy Number Variations and Gene Expression in Lung Adenocarcinoma
Source: PubMed Central journal article supplement (PMC3173487; doi:10.1371/journal.pone.0024829), 2011-09-14
Supplement: pone.0024829.s009.pdf [file pone.0024829.s009.pdf]

**Table S4. Genes involved in the IL-3 signaling and ephrin receptor signaling Pathways.**

| <b>Pathway</b>                   | <b>Number</b> | <b>Symbol</b>                                                                   |
|----------------------------------|---------------|---------------------------------------------------------------------------------|
| <b>IL-3 Signaling</b>            | 7             | <i>SHC1, FOXO1, MAPK1, RRAS, PI3KR5, PPPCC, RAPGEF1</i>                         |
| <b>Ephrin Receptor Signaling</b> | 10            | <i>SHC1, GNA11, MAPK1, RRAS, ARHGEF15, EFNA3, EFNA4, EFNA5, SH2D3C, RAPGEF1</i> |
